## Retraction

**Retraction: MiR-520f promotes cell aggressiveness by regulating fibroblast growth factor 16 in hepatocellular carcinoma****Feng Feng Xu<sup>1,\*</sup>, Wen Feng Xie<sup>2,\*</sup>, Guo Qing Zha<sup>3</sup>, Hong Wu Chen<sup>4</sup> and Liang Deng<sup>5</sup>**<sup>1</sup>Department II of General Surgery, The Fifth Affiliated Hospital of Guangzhou Medical University, Guangzhou 510700, China<sup>2</sup>Department of Intensive Care Unit, The Eastern Hospital of the First Affiliated Hospital, Sun Yat-sen University, Guangzhou 510700, China<sup>3</sup>Upper Limb Department of Orthopedics, The Eastern Hospital of the First Affiliated Hospital, Sun Yat-sen University, Guangzhou 510700, China<sup>4</sup>Department of Emergency, The Eastern Hospital of the First Affiliated Hospital, Sun Yat-sen University, Guangzhou 510700, China<sup>5</sup>Department of Hepatobiliary Surgery, The Seventh Affiliated Hospital, Sun Yat-sen University, Shenzhen 518107, China

\*These authors have contributed equally to this work

**Published:** December 31, 2025**Copyright:** © 2025 Xu et al. This is an open access article distributed under the terms of the [Creative Commons Attribution License](#) (CC BY 4.0), which permits unrestricted use, distribution, and reproduction in any medium, provided the original author and source are credited.

**This article has been retracted:** Oncotarget has completed its investigation of this paper. Image forensic analysis confirmed that panel J of Figure 2 duplicates panel G of Figure 5, and that panel G of Figure 5 duplicates panel E of Figure 7. In addition, Figure 4C was found to duplicate Figure 5E in reference [1]. The authors agreed that the article should be retracted, although the journal has not received a formal retraction statement from them.

Original article: Oncotarget. 2017; 8:109546–109558. <https://doi.org/10.18632/oncotarget.22726>**REFERENCES**

1. Li N, Cui T, Guo W, Wang D, Mao L. MiR-155-5p accelerates the metastasis of cervical cancer cell via targeting TP53INP1. *Oncotargets Ther.* 2019; 12:3181–96. <https://doi.org/10.2147/OTT.S193097>. [PubMed]
